# Supplementary material for: Boosting photocurrent of anodized Nb2O5 by synergetic post-synthesis electrochemical treatment
Source: Royal Society of Chemistry journal article supplement (doi:10.1039/d4ma00316k), 2024-01-01
Supplement: d4ma00316k1.pdf [file d4ma00316k1.pdf]

# Boosting photocurrent of anodized Nb<sub>2</sub>O<sub>5</sub> by synergetic post-synthesis electrochemical treatment

*(Supplementary Information)*

Wallas T. Menezes<sup>a</sup>, Roger Gonçalves<sup>a</sup> and Ernesto C. Pereira<sup>a\*</sup>

## SI.1 – 3D Topology

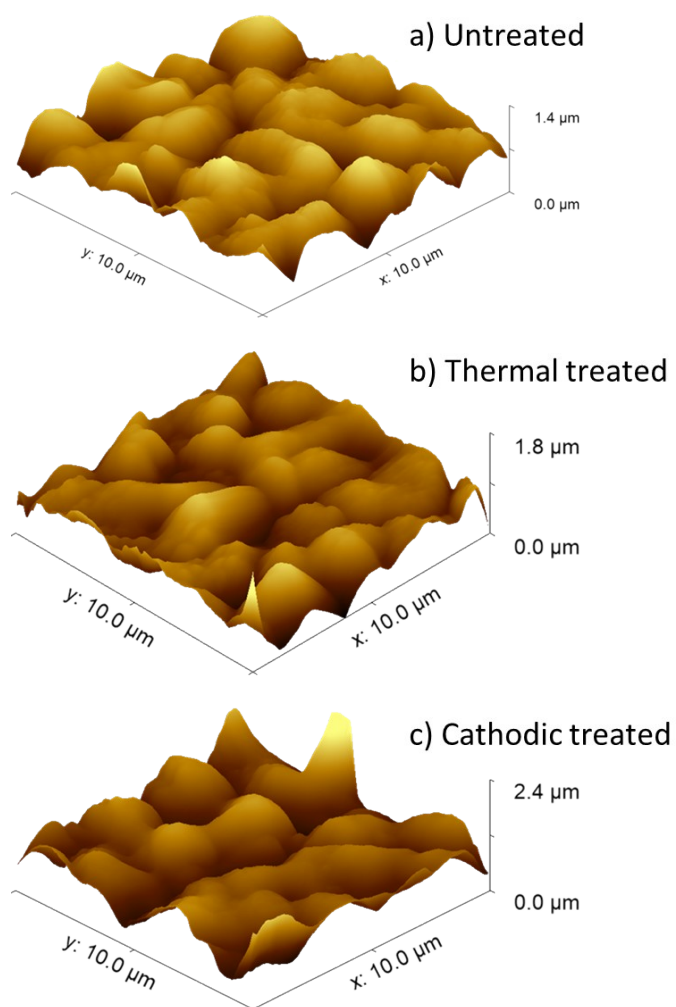

**Fig.S.I. 1:** 3D topographies of the samples: a) Untreated, b) Thermal treated, and c) Cathodic treated. Obtained by AFM in intermittent mode.
